# Supplementary material for: A real-world analysis of clinical outcomes in AML with myelodysplasia-related changes: a comparison of ICC and WHO-HAEM5 criteria
Source: PubMed Central journal article supplement — Blood Adv. 2024 Jan 30;8(7):1760–71. doi: 10.1182/bloodadvances.2023011869 (PMC10985805; doi:10.1182/bloodadvances.2023011869), 2024-01-30

**Supplementary Table 1.** Next-generation sequencing gene panel (A) Genes in the NGS Gene Panel (B) Exon coverage for hotspot genes

(A)

| <b>Complete coding region coverage (13/41)</b> | <b>Hotspot coverage (28/41)</b> |
|------------------------------------------------|---------------------------------|
| <i>BCOR</i>                                    | <i>ASXL1</i>                    |
| <i>BCORL1</i>                                  | <i>BRAF</i>                     |
| <i>CEBPA</i>                                   | <i>CALR</i>                     |
| <i>CUX1</i>                                    | <i>CBL</i>                      |
| <i>DNMT3A</i>                                  | <i>CSF3R</i>                    |
| <i>ETV6</i>                                    | <i>FBXW7</i>                    |
| <i>EZH2</i>                                    | <i>FLT3</i>                     |
| <i>IKZF1</i>                                   | <i>GATA2</i>                    |
| <i>PHF6</i>                                    | <i>GNAS</i>                     |
| <i>RAD21</i>                                   | <i>IDH1</i>                     |
| <i>RUNX1</i>                                   | <i>IDH2</i>                     |
| <i>STAG2</i>                                   | <i>JAK2</i>                     |
| <i>ZRSR2</i>                                   | <i>KIT</i>                      |
|                                                | <i>KMT2A</i>                    |
|                                                | <i>KRAS</i>                     |
|                                                | <i>MPL</i>                      |
|                                                | <i>MYD88</i>                    |
|                                                | <i>NOTCH1</i>                   |
|                                                | <i>NPM1</i>                     |
|                                                | <i>NRAS</i>                     |
|                                                | <i>PTPN11</i>                   |
|                                                | <i>SETBP1</i>                   |
|                                                | <i>SF3B1</i>                    |
|                                                | <i>SRSF2</i>                    |
|                                                | <i>TET2</i>                     |
|                                                | <i>TP53</i>                     |
|                                                | <i>U2AF1</i>                    |
|                                                | <i>WT1</i>                      |

(B)

| <b>Gene</b>   | <b>Exon Coverage</b> |
|---------------|----------------------|
| <i>ASXL1</i>  | 12                   |
| <i>BRAF</i>   | 15                   |
| <i>CALR</i>   | 9                    |
| <i>CBL</i>    | 8, 9                 |
| <i>CSF3R</i>  | 14-17                |
| <i>FBXW7</i>  | 9-11                 |
| <i>FLT3</i>   | 14, 15, 20           |
| <i>GATA2</i>  | 2-6                  |
| <i>GNAS</i>   | 8, 9                 |
| <i>IDH1</i>   | 4                    |
| <i>IDH2</i>   | 4                    |
| <i>JAK2</i>   | 12, 14               |
| <i>KIT</i>    | 2, 8-11, 13, 17      |
| <i>KMT2A</i>  | 5-8                  |
| <i>KRAS</i>   | 2,3                  |
| <i>MPL</i>    | 10                   |
| <i>MYD88</i>  | 3-5                  |
| <i>NOTCH1</i> | 26-28, 34            |
| <i>NPM1</i>   | 12                   |
| <i>NRAS</i>   | 2, 3                 |
| <i>PTPN11</i> | 3, 13                |
| <i>SETBP1</i> | 4                    |
| <i>SF3B1</i>  | 13-16                |
| <i>SRSF2</i>  | 1                    |
| <i>TET2</i>   | 3-11                 |
| <i>TP53</i>   | 2-11                 |
| <i>U2AF1</i>  | 2, 6                 |
| <i>WT1</i>    | 7, 9                 |

**Supplementary Table 2.** Summary descriptives table of study cohort by WHO-HAEM5

|                                    | <b>AEL</b>             | <b>AML-DIFF</b>      | <b>AML-MR</b>         | <b>AML-pCT</b>         | <b>P-value</b> |
|------------------------------------|------------------------|----------------------|-----------------------|------------------------|----------------|
|                                    | <b>N=3</b>             | <b>N=47</b>          | <b>N=354</b>          | <b>N=28</b>            |                |
| Sex:                               |                        |                      |                       |                        | 0.030          |
| Female                             | 1 (33%)                | 22 (47%)             | 120 (34%)             | 16 (57%)               |                |
| Male                               | 2 (67%)                | 25 (53%)             | 234 (66%)             | 12 (43%)               |                |
| Age at Diagnosis (yr)              | 71.3 (59.0, 80.0)      | 66.0 (18.0, 94.0)    | 72.0 (19.0, 95.0)     | 68.0 (22.0, 80.0)      | 0.031          |
| Blast (%)                          | 70.0 (40.0, 82.0)      | 42.5 (12.0, 95.0)    | 38.0 (12.0, 96.0)     | 51.5 (20.0, 97.0)      | 0.215          |
| WBC (x10 <sup>9</sup> /L)          | 6.8 (6.0, 9.2)         | 4.0 (0.5, 188.4)     | 3.7 (0.1, 328.7)      | 3.9 (0.3, 209.4)       | 0.770          |
| Hemoglobin (g/L)                   | 85.0 (81.0, 89.0)      | 90.0 (40.0, 197.0)   | 86.0 (11.0, 169.0)    | 77.0 (37.0, 113.0)     | 0.274          |
| Platelet (x10 <sup>9</sup> /L)     | 38.0 (23.0, 46.0)      | 71.0 (10.0, 419.0)   | 56.5 (6.0, 2,726.0)   | 40.0 (5.0, 247.0)      | 0.127          |
| LDH (U/L)                          | 952.0 (371.0, 2,438.0) | 318.0 (148.0, 891.0) | 309.0 (90.0, 9,473.0) | 243.0 (154.0, 4,596.0) | 0.241          |
| <i>CEBPA</i> Mutation <sup>†</sup> | 0 (0%)                 | 1 (2.1%)             | 25 (7.1%)             | 1 (3.6%)               | 0.576          |
| <i>DNMT3A</i> Mutation             | 1 (33%)                | 10 (21%)             | 66 (19%)              | 6 (21%)                | 0.703          |
| <i>IDH1</i> Mutation               | 0 (0%)                 | 5 (11%)              | 37 (10%)              | 3 (11%)                | >0.999         |
| <i>IDH2</i> Mutation               | 0 (0%)                 | 7 (15%)              | 55 (16%)              | 2 (7.1%)               | 0.747          |
| <i>KRAS</i> Mutation               | 0 (0%)                 | 4 (8.5%)             | 17 (4.8%)             | 1 (3.6%)               | 0.529          |
| <i>NRAS</i> Mutation               | 0 (0%)                 | 4 (8.5%)             | 28 (7.9%)             | 5 (18%)                | 0.295          |
| <i>TP53</i> Mutation               | 3 (100%)               | 1 (2.1%)             | 100 (28%)             | 11 (39%)               | <0.001         |
| Karyotype Group:                   |                        |                      |                       |                        | <0.001         |
| Abnormal karyotype                 | 3 (100%)               | 21 (45%)             | 264 (75%)             | 20 (71%)               |                |
| Normal Karyotype                   | 0 (0%)                 | 26 (55%)             | 90 (25%)              | 8 (29%)                |                |
| Trisomy 8                          | 0 (0%)                 | 7 (15%)              | 63 (18%)              | 3 (11%)                | 0.798          |
| Monosomy 17                        | 1 (33%)                | 0 (0%)               | 53 (15%)              | 9 (32%)                | <0.001         |
| Type of Induction Treatment:       |                        |                      |                       |                        | -              |

|                        | <b>AEL</b> | <b>AML-DIFF</b> | <b>AML-MR</b> | <b>AML-pCT</b> | <b>p-value</b> |
|------------------------|------------|-----------------|---------------|----------------|----------------|
|                        | <b>N=3</b> | <b>N=47</b>     | <b>N=354</b>  | <b>N=28</b>    |                |
| Best supportive care   | 2 (67%)    | 8 (17%)         | 62 (18%)      | 9 (32%)        |                |
| HMA/VEN                | 0 (0%)     | 2 (4.3%)        | 40 (11%)      | 1 (3.6%)       |                |
| Intensive chemotherapy | 1 (33%)    | 31 (66%)        | 169 (48%)     | 14 (50%)       |                |
| Less intensive         | 0 (0%)     | 6 (13%)         | 83 (23%)      | 4 (14%)        |                |
| Response:              |            |                 |               |                | 0.270          |
| CR                     | 1 (33%)    | 28 (62%)        | 140 (47%)     | 9 (47%)        |                |
| No CR                  | 2 (67%)    | 17 (38%)        | 156 (53%)     | 10 (53%)       |                |
| Any Relapse            | 0 (0%)     | 15 (56%)        | 86 (65%)      | 9 (82%)        | 0.324          |
| HCT                    | 0 (0%)     | 19 (40.4%)      | 88 (24.9%)    | 8 (29%)        | 0.111          |
| ELN 2022 Risk:         |            |                 |               |                | <0.001         |
| Adverse                | 3 (100%)   | 8 (17.0%)       | 345 (97.5%)   | 21 (75%)       |                |
| Intermediate           | 0 (0%)     | 39 (83.0%)      | 8 (2.26%)     | 7 (25%)        |                |
| Mutation count         | 3 (1, 5)   | 2 (0, 6)        | 3 (0, 9)      | 2 (0, 9)       | 0.002          |

AEL, acute erythroid leukemia; AML-DIFF, AML by differentiation; AML-MR, AML with myelodysplasia-related; AML-pCT, AML post cytotoxic therapy; BM, bone marrow, WBC, white blood cell count; LDH, lactate dehydrogenase; ITD, internal tandem duplication; HMA/VEN, hypomethylating agents/venetoclax; CR, complete remission; HCT, hematopoietic stem cell transplant; ELN, European LeukemiaNet.

Continuous variables are expressed as median (range) and compared with Fisher's exact test. Categorical variables are expressed as frequency (percentage) and compared with Kruskal-Wallis rank sum test.

† *CEBPA* mutations other than those which meet the criteria from either WHO or ICC for defining AML with mutated *CEBPA*.

**Supplementary Table 3.** Patient Characteristics by *TP53* mutation status

|                                    | <b>Negative<br/>N = 317</b> | <b>Positive<br/>N = 115</b> | <b>p-value</b> |
|------------------------------------|-----------------------------|-----------------------------|----------------|
| Sex                                |                             |                             | <0.001         |
| Female                             | 101 (32%)                   | 58 (50%)                    |                |
| Male                               | 216 (68%)                   | 57 (50%)                    |                |
| Age at diagnosis (yr)              | 71.0 (18.0, 95.0)           | 73.0 (38.0, 94.0)           | 0.113          |
| Blast (%)                          | 40.0 (12.0, 97.0)           | 37.0 (20.0, 91.0)           | 0.219          |
| WBC (x10 <sup>9</sup> /L)          | 4.0 (0.1, 328.7)            | 2.9 (0.1, 76.9)             | 0.005          |
| Hemoglobin (g/L)                   | 86.0 (11.0, 197.0)          | 84.0 (57.0, 123.0)          | 0.083          |
| Platelet (x10 <sup>9</sup> /L)     | 63.5 (5.0, 2,726.0)         | 42.0 (6.0, 355.0)           | 0.001          |
| LDH (U/L)                          | 276.0 (90.0, 9,473.0)       | 323.0 (141.0, 3,569.0)      | 0.031          |
| Prior myeloid neoplasms            | 45 (14%)                    | 3 (2.6%)                    | <0.001         |
| Prior cytotoxic therapy            | 17 (5.4%)                   | 11 (9.6%)                   | 0.117          |
| Type of Karyotype:                 |                             |                             | <0.001         |
| Abnormal karyotype                 | 195 (62%)                   | 113 (98%)                   |                |
| Normal Karyotype                   | 122 (38%)                   | 2 (1.7%)                    |                |
| Complex Karyotype                  | 68 (21%)                    | 108 (94%)                   | <0.001         |
| Trisomy 8                          | 53 (17%)                    | 20 (18%)                    | 0.851          |
| Monosomy 17                        | 7 (2.2%)                    | 56 (49%)                    | <0.001         |
| Mutation count                     | 3.0 (0.0, 9.0)              | 2.0 (1.0, 6.0)              | <0.001         |
| <i>FLT3</i> -ITD                   | 29 (25%)                    | 0 (0%)                      | 0.003          |
| <i>DNMT3A</i> Mutation             | 63 (20%)                    | 20 (17%)                    | 0.563          |
| <i>IDH1</i> Mutation               | 36 (11%)                    | 9 (7.8%)                    | 0.288          |
| <i>IDH2</i> Mutation               | 61 (19%)                    | 3 (2.6%)                    | <0.001         |
| <i>NRAS</i> Mutation               | 33 (10%)                    | 4 (3.5%)                    | 0.023          |
| <i>KRAS</i> Mutation               | 20 (6.3%)                   | 2 (1.7%)                    | 0.056          |
| <i>CEBPA</i> Mutation <sup>†</sup> | 26 (8.2%)                   | 1 (0.9%)                    | 0.005          |
| ELN 2022 Risk:                     |                             |                             | <0.001         |

|                                 | <b>Negative<br/>N = 317</b> | <b>Positive<br/>N = 115</b> | <b>p-value</b> |
|---------------------------------|-----------------------------|-----------------------------|----------------|
| Adverse                         | 263 (83%)                   | 114 (99%)                   |                |
| Intermediate                    | 53 (17%)                    | 1 (0.9%) <sup>§</sup>       |                |
| Type of Induction chemotherapy: |                             |                             | <0.001         |
| Best supportive care            | 46 (15%)                    | 35 (30%)                    |                |
| HMA/VEN                         | 36 (11%)                    | 7 (6.1%)                    |                |
| Intensive chemotherapy          | 170 (54%)                   | 45 (39%)                    |                |
| Less intensive                  | 65 (21%)                    | 28 (24%)                    |                |
| HCT                             | 101 (32%)                   | 14 (12%)                    | <0.001         |
| Response:                       |                             |                             | <0.001         |
| CR                              | 154 (55%)                   | 24 (29%)                    |                |
| No CR                           | 126 (45%)                   | 59 (71%)                    |                |
| Relapse                         | 91 (61%)                    | 19 (86%)                    | 0.023          |

BM, bone marrow, WBC, white blood cell count; LDH, lactate dehydrogenase; ITD, internal tandem duplication; HMA/VEN, hypomethylating agents/venetoclax; CR, complete remission; HCT, hematopoietic stem cell transplant; ELN, European LeukemiaNet.

Continuous variables are expressed as median (range) and compared with Fisher's exact test.

Categorical variables are expressed as frequency (percentage) and compared with Kruskal-Wallis rank sum test.

§ The *TP53* mutation allelic frequency is <10%; thus by ELN 2022 definition, this patient falls into intermediate risk category.

† *CEBPA* mutations other than those which meet the criteria from either WHO or ICC for defining AML with mutated *CEBPA*.

**Supplementary Figure 1.** The two simplified algorithms derived from newly published AML classifications.

**A. WHO-HAEM5 classification of Acute Myeloid Leukemias**

**B. ICC classification of Acute Myeloid Leukemias**

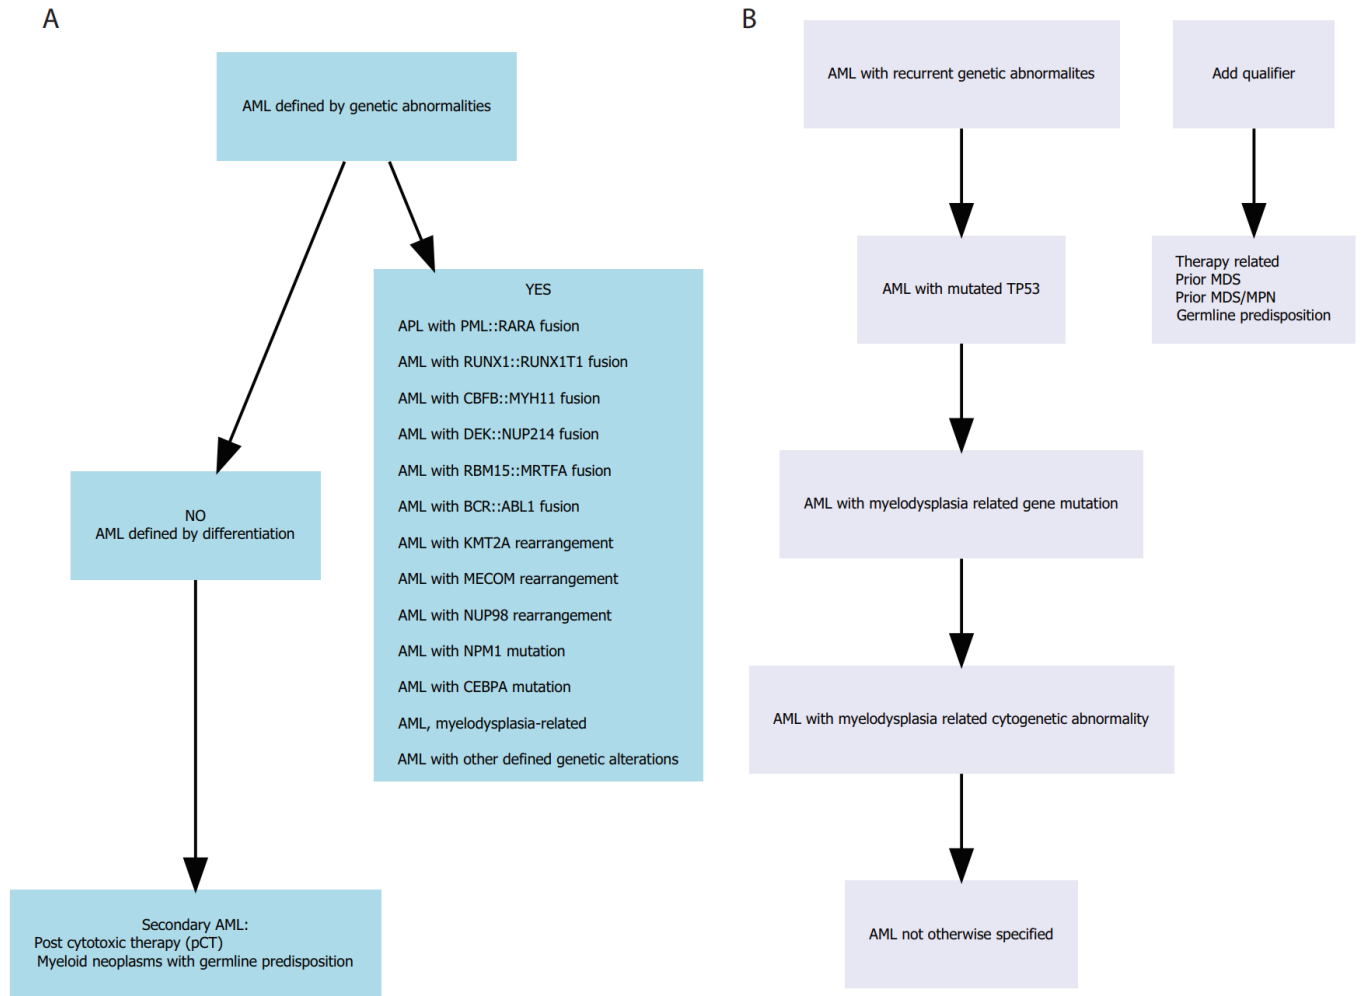

\* Acute Erythroid Leukemia takes precedence over AML, myelodysplasia-related in WHO-HAEM5

Abbreviations: AML, acute myeloid leukemia; MDS, myelodysplastic neoplasms; MDS/MPN, myelodysplastic neoplasm/myeloproliferative neoplasm.

WHO defined myelodysplasia-related cytogenetic abnormalities: Complex karyotype ( $\geq 3$  abnormalities), 5q deletion or loss of 5q due to unbalanced translocation, Monosomy 7, 7q deletion, or loss of 7q due to unbalanced translocation, 11q deletion, 12p deletion or loss of 12p due to unbalanced translocation,

Monosomy 13 or 13q deletion 17p deletion or loss of 17p due to unbalanced translocation

Isochromosome 17q, idic(X)(q13)

ICC defined myelodysplasia-related cytogenetic abnormalities: complex karyotype (3 unrelated clonal chromosomal abnormalities in the absence of other class defining recurring genetic abnormalities), del(5q)/t(5q)/add(5q), 27/del(7q), 18, del(12p)/t(12p)/add(12p), i(17q), 217/add(17p) or del(17p), del(20q), and/or idic(X)(q13) clonal abnormalities



**Supplementary figure 2. A. B.** Kaplan-Meier curves comparing OS and EFS between ICC-AML-MR and WHO-AML-MR in patients who received intensive chemotherapies. **C. D.** Kaplan-Meier curves comparing OS and EFS between intermediate and adverse risk groups in ELN 2022 risk stratification.

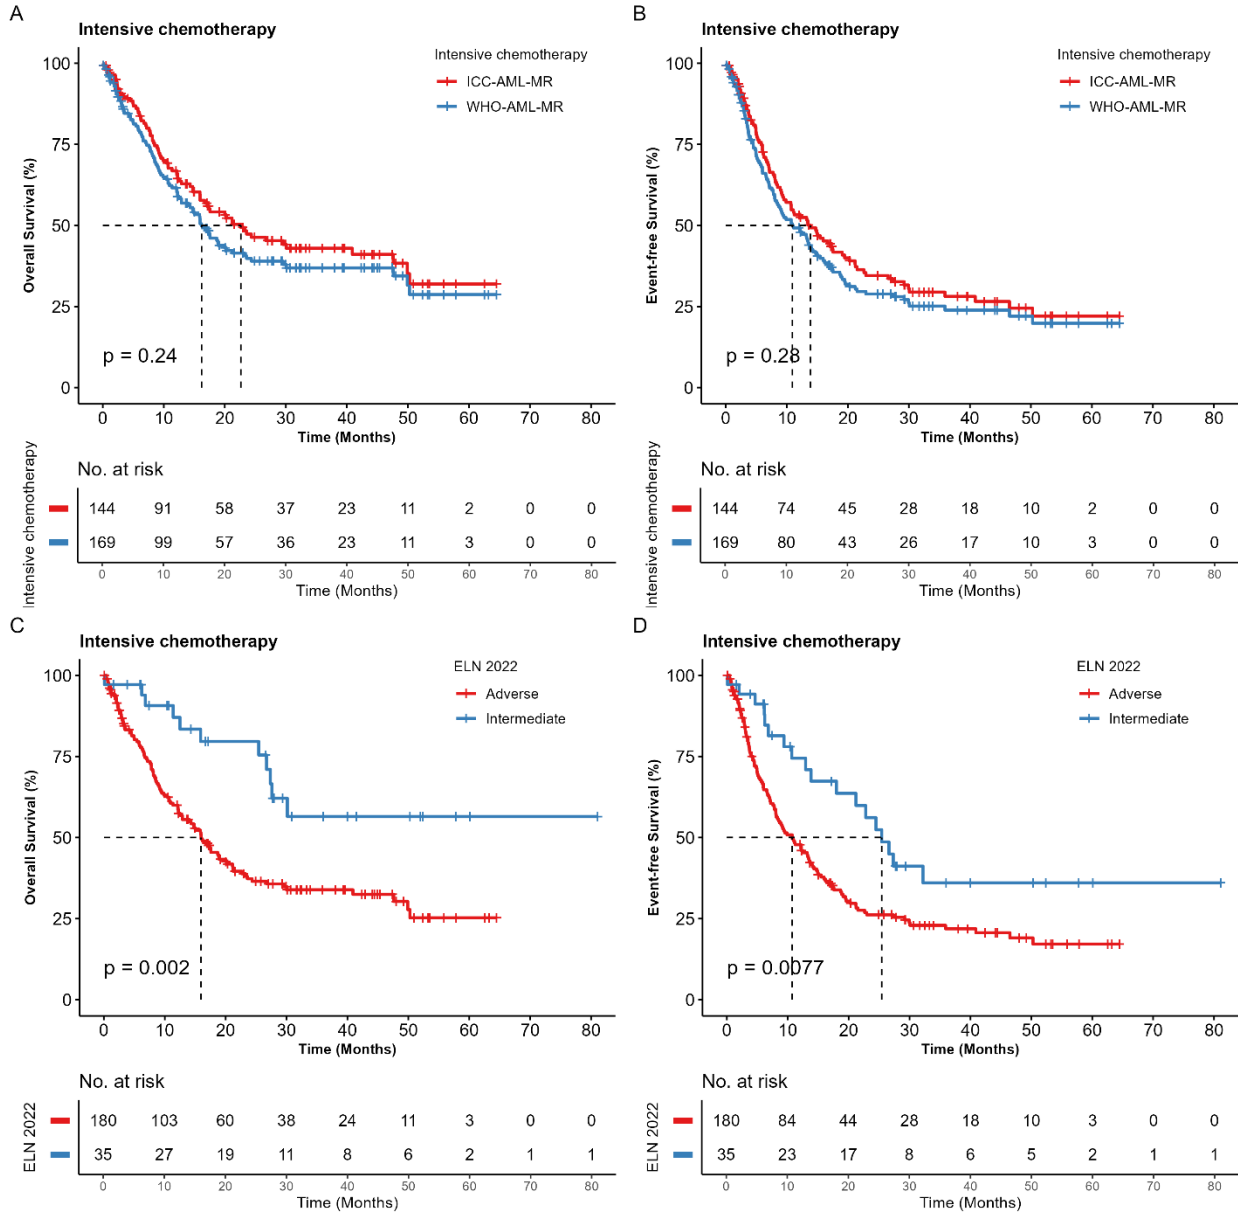

**Supplementary figure 3. A. B.** Kaplan-Meier curves of OS and EFS comparing *TP53* mutated and *TP53* wild-type in patients with intensive chemotherapy.

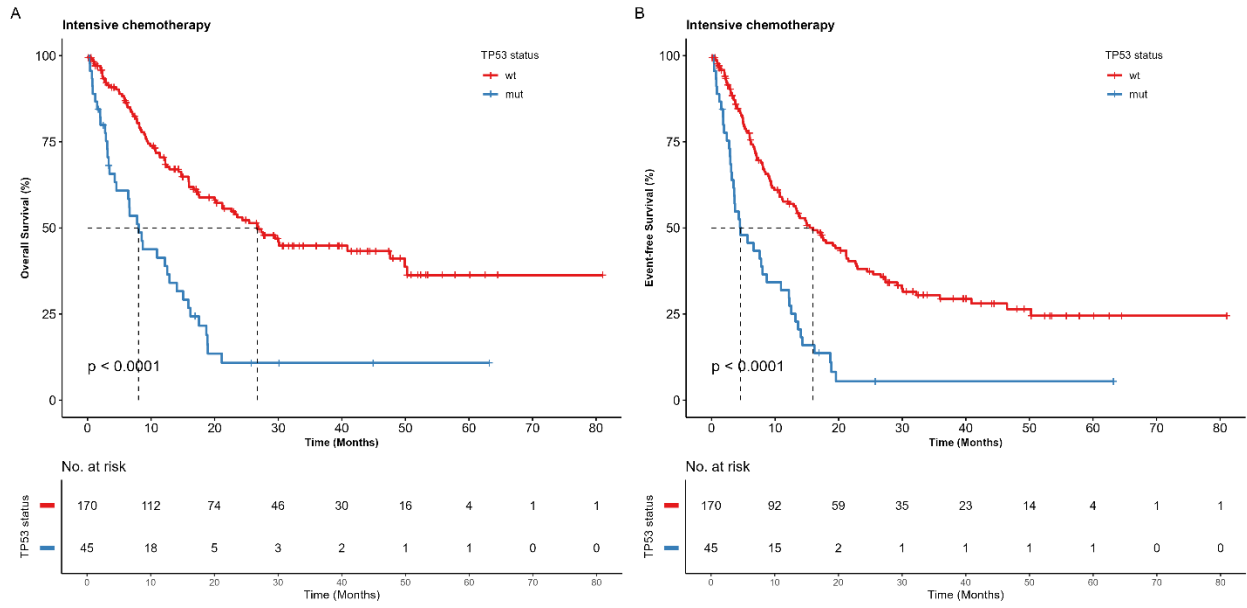

**Supplementary figure 4. A.** Schematic of clinical workflow to determine TP53 allelic state based on TP53 mutations and cytogenetic loss of chromosome 17p by karyotype assessment. **B.** and **C.** Kaplan-Meier survival curves comparing intensively treated AML-MR patients according to the TP53 allelic state.

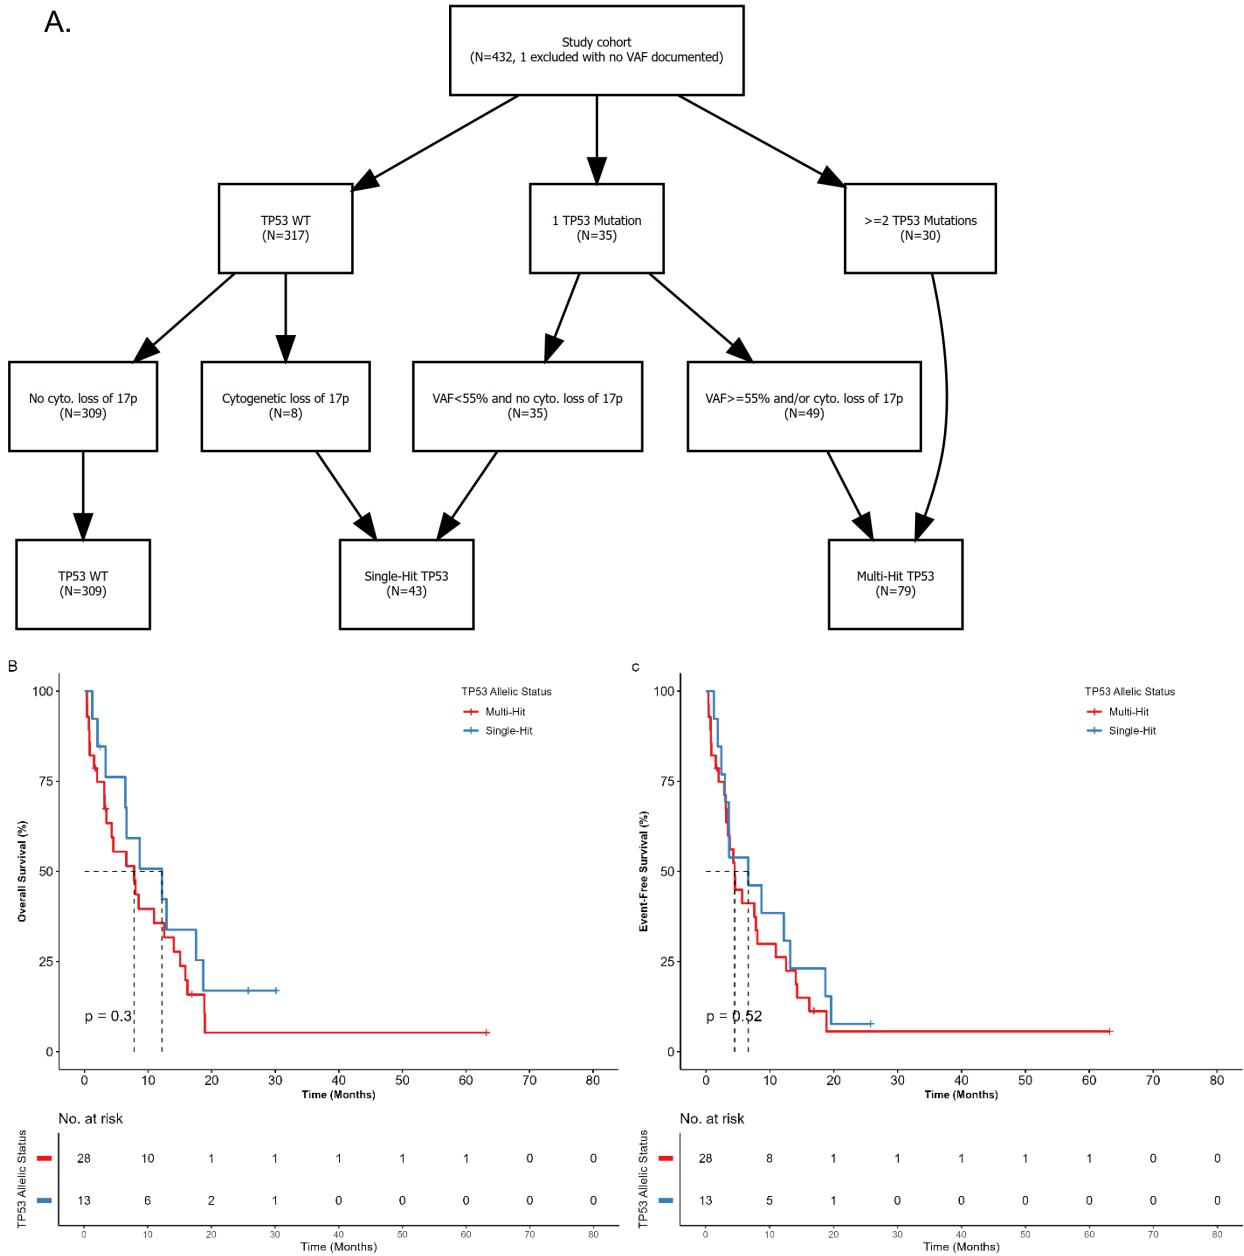

**Supplementary Figure 5.** Kaplan-Meier survival curves comparing ontogeny in WHO-AML-MR (A) and ICC-AML-MR-M/CG (B).

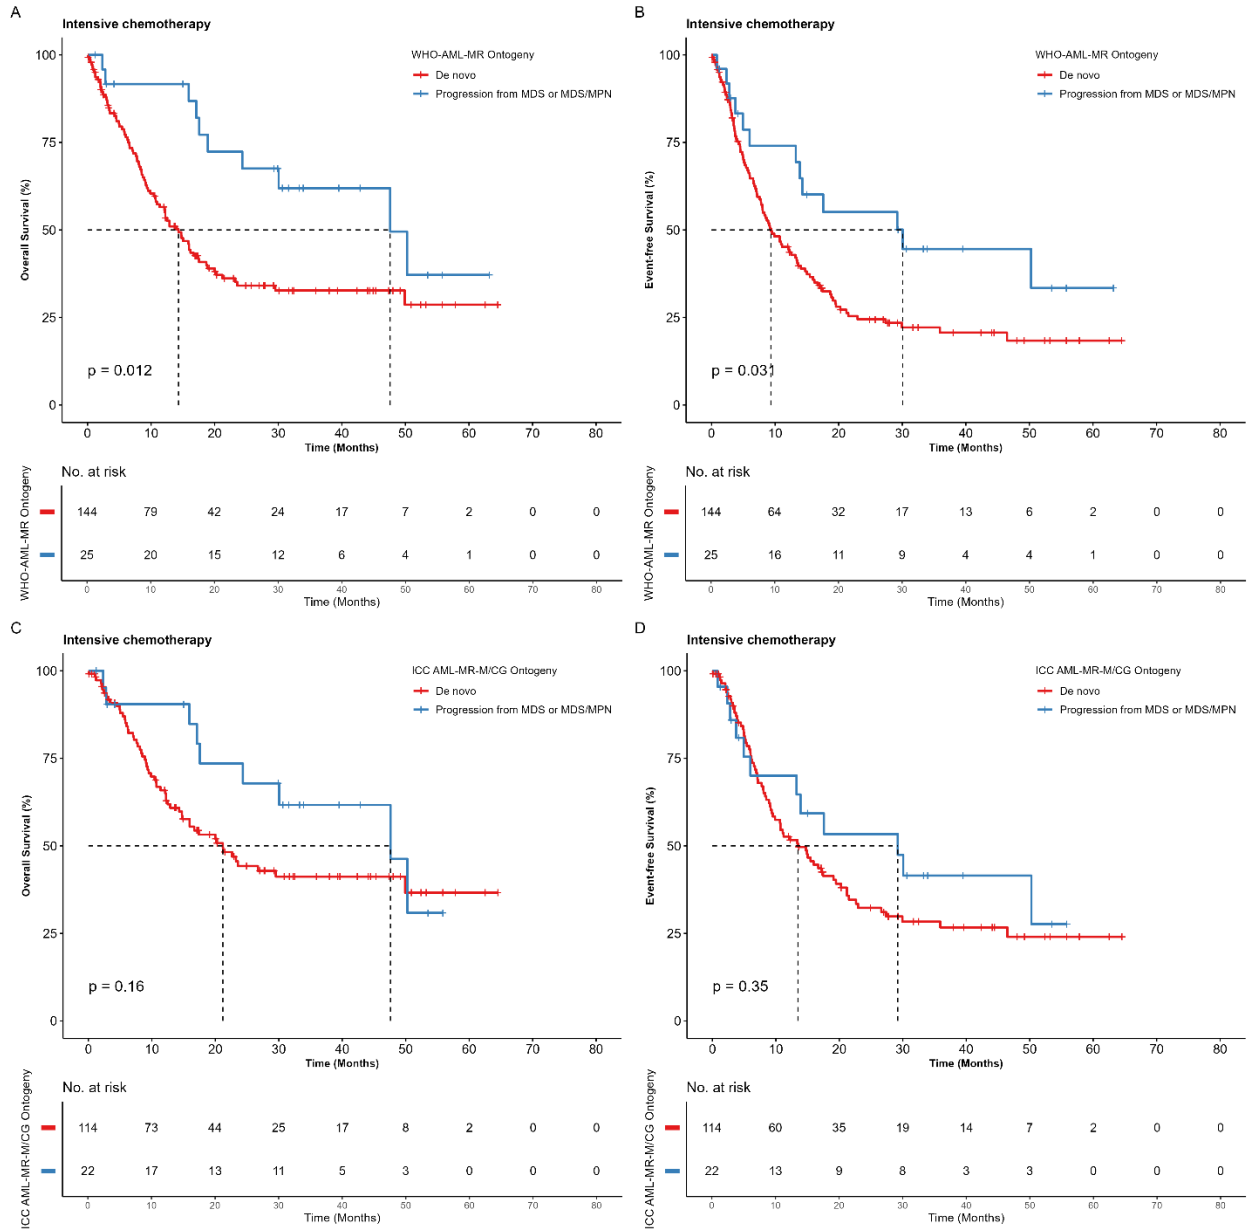

**Supplementary Figure 6.** Kaplan-Meier survival curves comparing patients with prior cytotoxic therapy according to ICC classification.

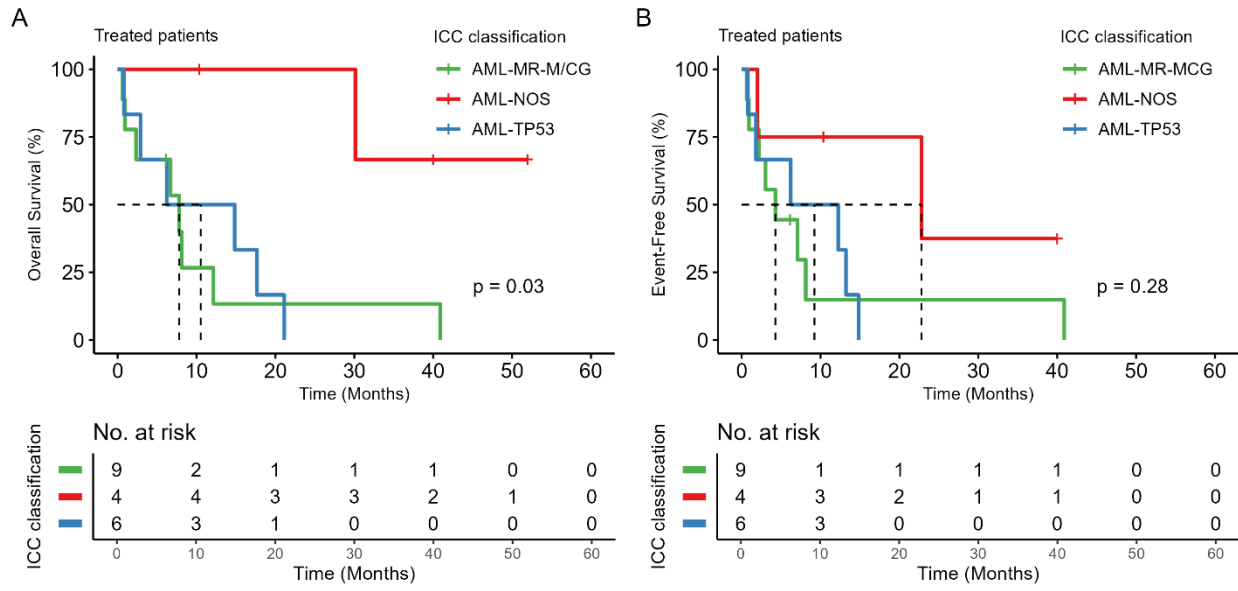

## Supplementary Figure 7. BEAT AML 2.0 workflow

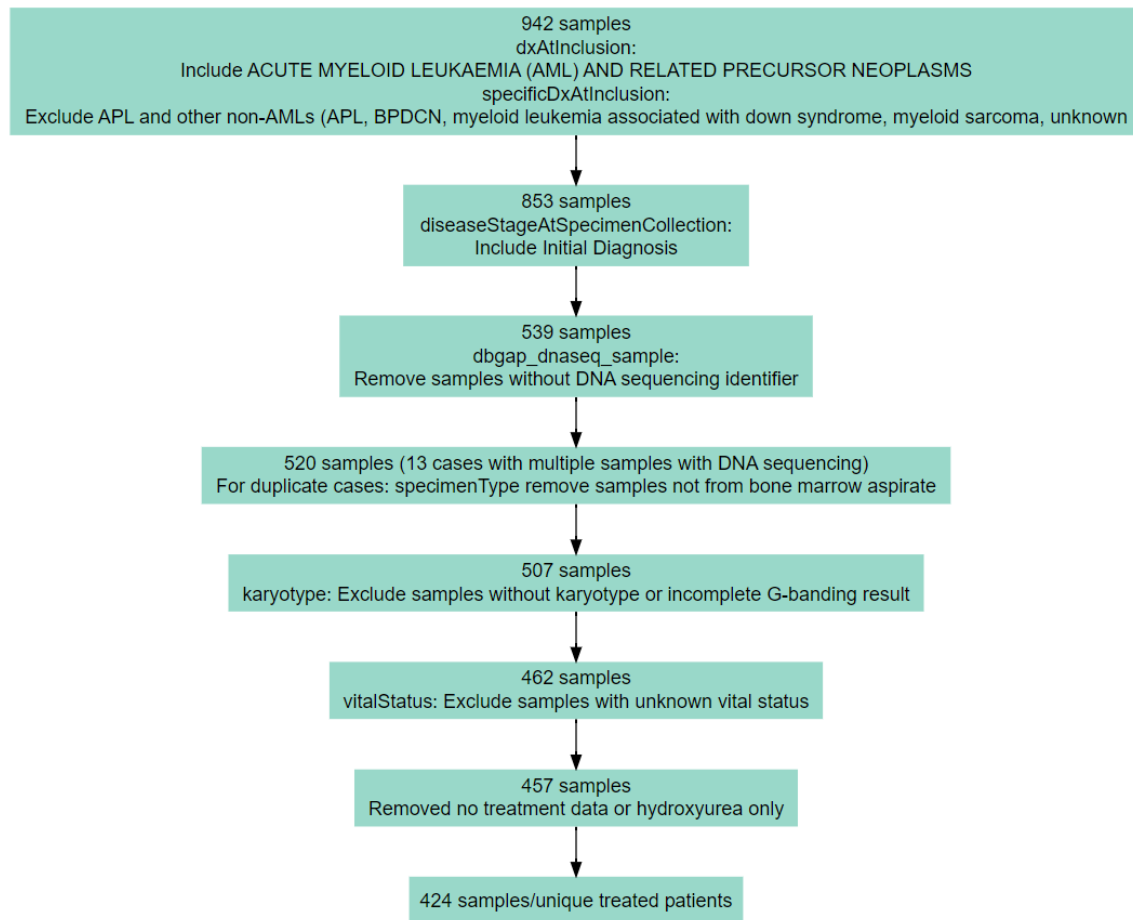

**Supplementary Figure 8. BEAT-AML 2.0 cohort survival plots**

**A. Classifying the cohort based on WHO-HAEM5, comparing AML-MR and AML by diff**

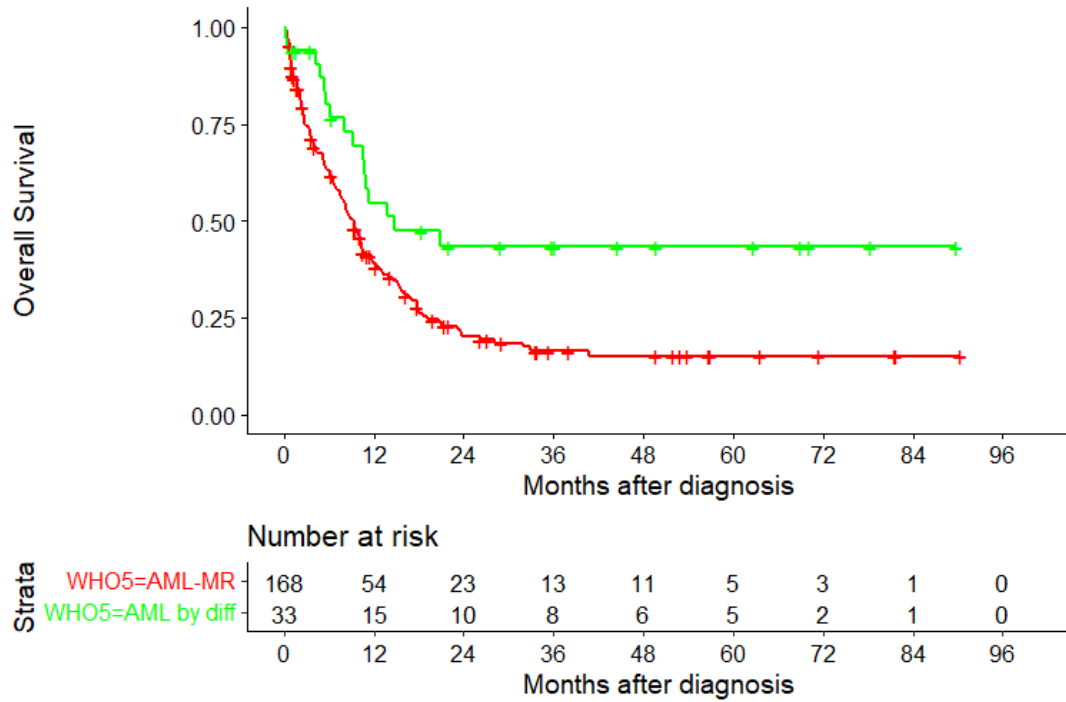

**B. Separating TP53-mutated cases into a separate entity, comparing AML-MR, AML by diff and AML with TP53**

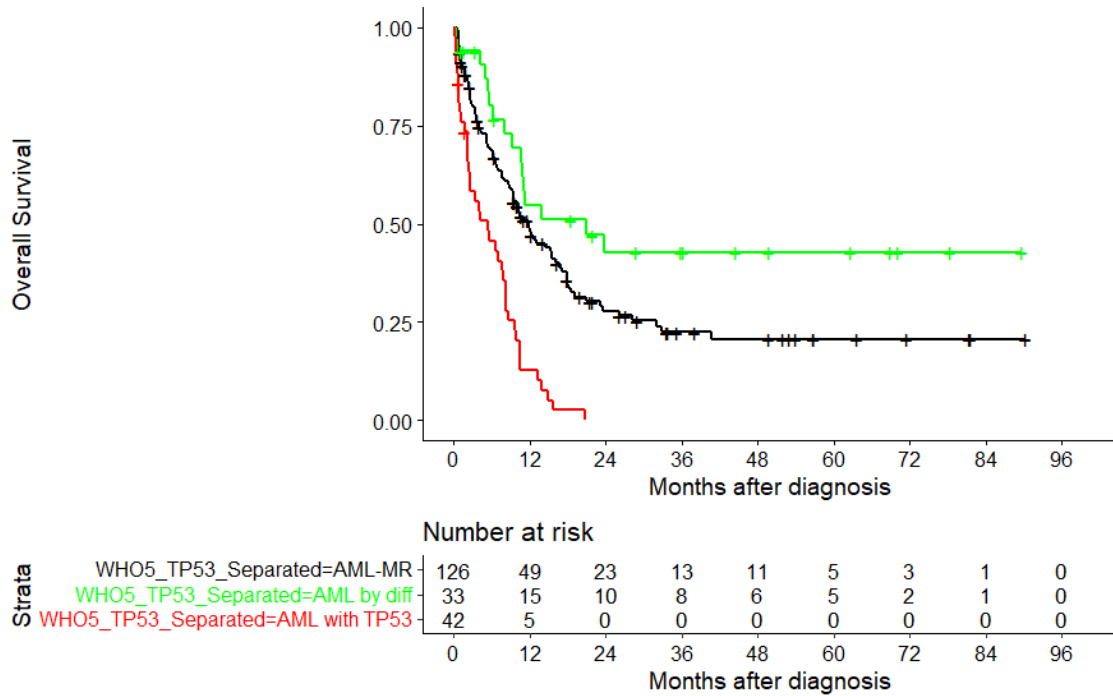

C. Classifying cohort based on ICC

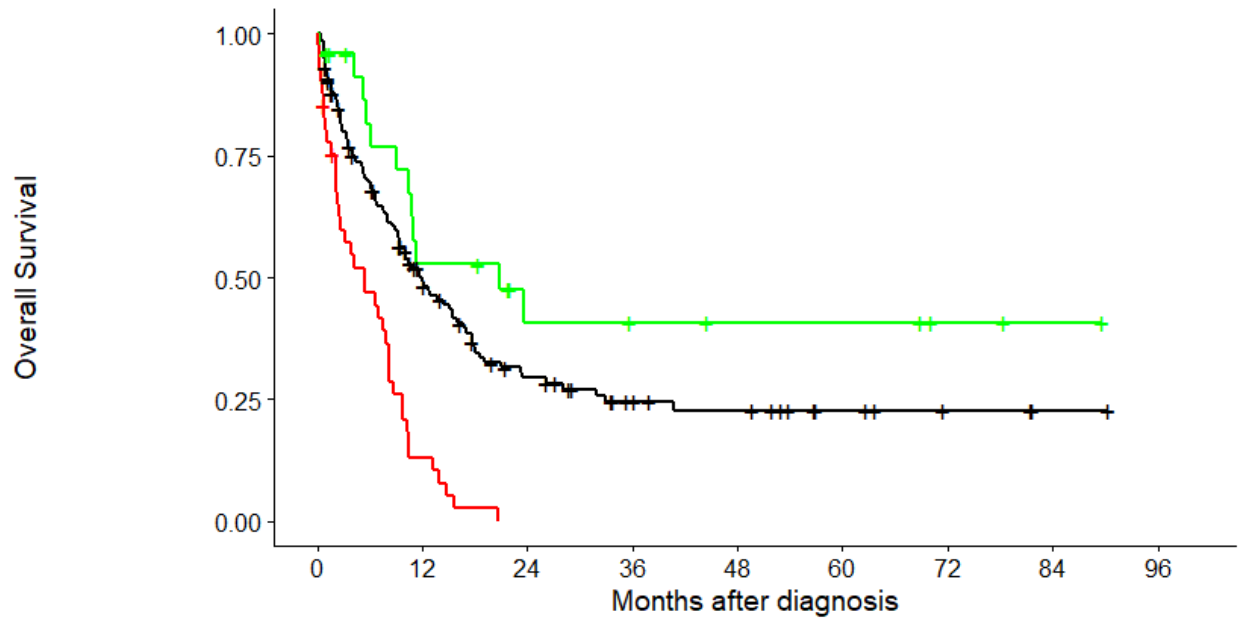

|                   |            | Number at risk |    |    |    |    |    |    |    |    |
|-------------------|------------|----------------|----|----|----|----|----|----|----|----|
| Strata            |            | 0              | 12 | 24 | 36 | 48 | 60 | 72 | 84 | 96 |
|                   | ICC=AML-MR | 133            | 53 | 27 | 16 | 13 | 6  | 3  | 1  | 0  |
| ICC=AML-NOS       | 25         | 11             | 6  | 5  | 4  | 4  | 2  | 1  | 0  |    |
| ICC=AML with TP53 | 41         | 5              | 0  | 0  | 0  | 0  | 0  | 0  | 0  |    |



### D. Changing the order of assignments in AML-MR defined by ICC criteria

AML-MR by gene mutations > AML-MR by cytogenetics

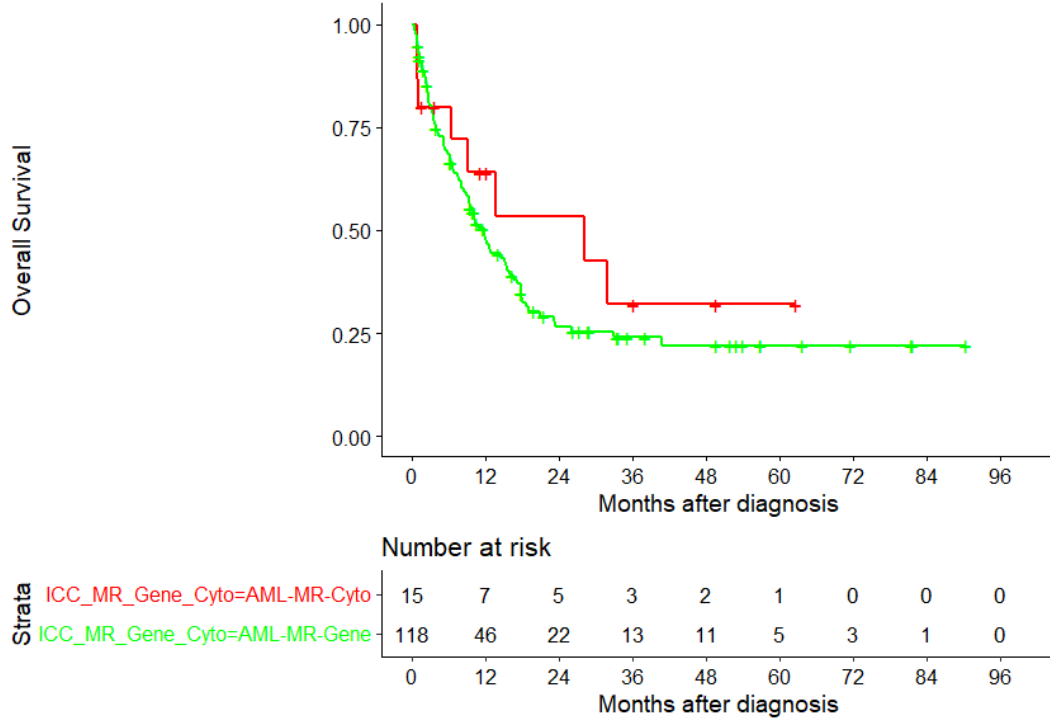

AML-MR by cytogenetics > AML-MR by gene mutations

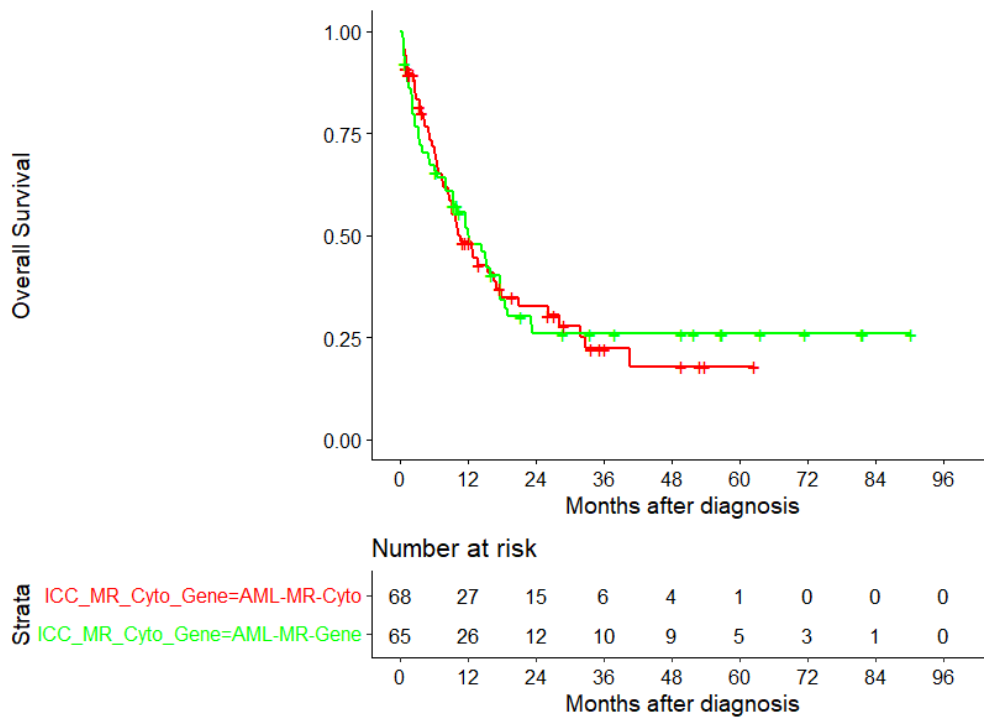

**Supplementary Figure 9. A. B.** Kaplan-Meier curves comparing OS and EFS between ICC and/or WHO defining AML-MR cytogenetic abnormalities.

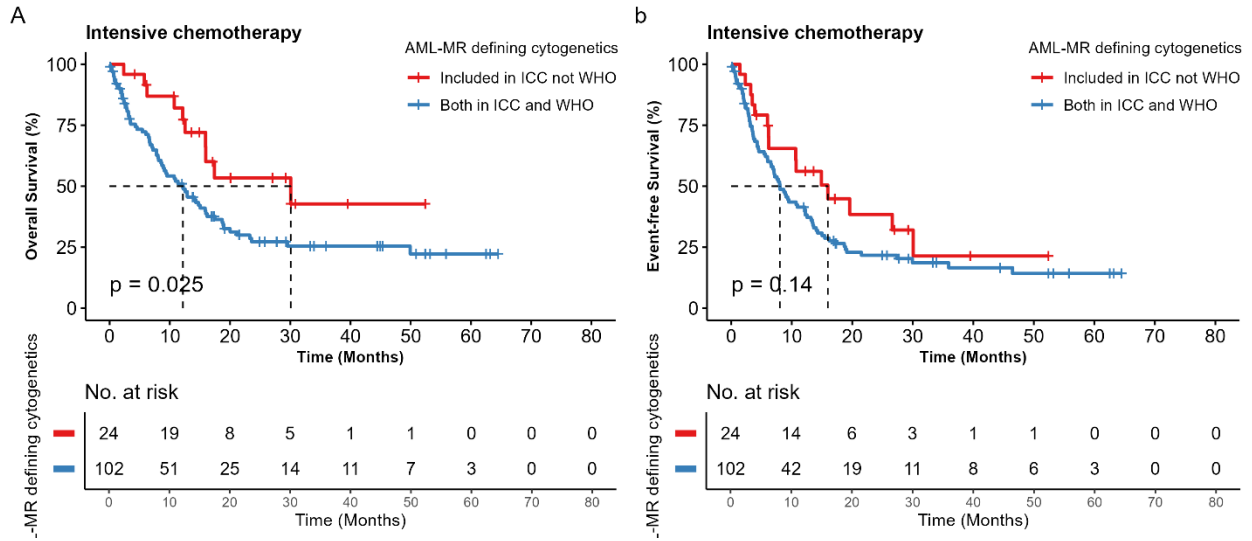

Supplement: BLOODA_ADV-2023-011869-mmc1.pdf [file BLOODA_ADV-2023-011869-mmc1.pdf]
